# Supplementary material for: Steroid-Sparing Effect, Effectiveness, and Tolerability of Mepolizumab with EGPA in Real World Clinical Practice
Source: Research Square preprint supplement (doi:10.21203/rs.3.rs-763650/v1), 2021-09-01
Supplement: Supplementary file 1 [file b0255974e92660fc46c4e635.xlsx]

## Sheet: Sheet1
	ID	Age	性	ANCA陽性	BVAS Dx.	BVAS１M	BVAS2M	BVAS3M	BVAS6M	BVAS9M	BVAS12M	多発単神経炎	肺浸潤影	副鼻腔異常	心筋障害	糸球体腎炎	肺胞出血	紫斑、皮膚障害	免疫療法	気管支喘息	IgE	102414	全身症状	皮膚	粘膜	耳鼻科	胸部	心血管	腹部	腎	神経	BVAS計
	102414	61	M		20							+	+	+	－	－	－	+	－	+	867	投与時	体重減少、筋肉痛	紫斑	なし	なし	浸潤影	なし	なし	なし	なし	9
				negative	末梢血好酸球数Dx→導入時	１M	２M	3M	6M	9M	12M											１M	あり	紅斑	なし	なし	なし	なし	なし	なし	なし	5
					13769→18	26	15	35														２M	改善	なし	なし	なし	なし	なし	なし	なし	なし	0
					ステロイド導入時	１M	２M	3M	6M	9M	12M											3M	改善	なし	なし	なし	なし	なし	なし	なし	なし	0
					35mg/day	30	25	12.5														6M
	ID	Age	性	ANCA陽性	BVAS 導入時	BVAS１M	BVAS2M	BVAS3M	BVAS6M	BVAS9M	BVAS12M	多発単神経炎	肺浸潤影	副鼻腔異常	心筋障害	糸球体腎炎	肺胞出血	紫斑、皮膚障害	免疫療法	気管支喘息		9M
	174766	46	F	P-ANCA30.3								-	+	+	-	-	-	+	CY100㎎	－		12M
				C-ANCA25.9	末梢血好酸球数Dx.	１M	２M	3M	6M	9M	12M
					4369→36	9	8	56	0	9	12										減量率	174766	全身症状	皮膚	粘膜	耳鼻科	胸部	心血管	腹部	腎	神経
					ステロイド導入時	１M	２M	3M	6M	9M	12M											投与時	筋肉痛	なし	なし	なし	なし	なし	なし	なし	あり	10
					20	17.5	15	12.5	12	11	10										0.428571	１M	なし	なし	なし	なし	なし	なし	なし	なし	なし	0
	ID	Age	性	ANCA陽性	BVAS 導入時	BVAS１M	BVAS2M	BVAS3M	BVAS6M	BVAS9M	BVAS12M	多発単神経炎	肺浸潤影	副鼻腔異常	心筋障害	糸球体腎炎	肺胞出血	紫斑、皮膚障害	免疫療法	気管支喘息		２M	なし	なし	なし	なし	なし	なし	なし	なし	なし	0
	221004	41	F									+	+	－	－	－	－	－	－	+	948	3M	なし	なし	なし	なし	なし	なし	なし	なし	なし	0
				negative	末梢血好酸球数Dx.	１M	２M	3M	6M	9M	12M											6M	なし	なし	なし	なし	なし	なし	なし	なし	なし	0
					41960→648	113	79	77	144	92	93											9M	なし	なし	なし	なし	なし	なし	なし	なし	なし	0
					ステロイド導入時	１M	２M	3M	6M	9M	12M											12M	なし	なし	なし	なし	なし	なし	なし	なし	なし	0
					10	9	8	7	4	2	1										0.888889
	ID	Age	性	ANCA陽性	BVAS 導入時	BVAS１M	BVAS2M	BVAS3M	BVAS6M	BVAS9M	BVAS12M	多発単神経炎	肺浸潤影	副鼻腔異常	心筋障害	糸球体腎炎	肺胞出血	紫斑、皮膚障害	免疫療法	気管支喘息		221004	全身症状	皮膚	粘膜	耳鼻科	胸部	心血管	腹部	腎	神経
	176276	72	M									+	+	-	-	+	+	-	-	+		投与時	なし	なし	なし	なし	なし	なし	なし	なし	なし	0
				P-ANCA74.3	末梢血好酸球数Dx.	１M	２M	3M	6M	9M	12M										387	１M	なし	なし	なし	なし	なし	なし	なし	なし	なし	0
					6673→18	30	32	30	35	70	67											２M	なし	なし	なし	なし	なし	なし	なし	なし	なし	0
					ステロイド導入時	１M	２M	3M	6M	9M	12M											3M	なし	なし	なし	なし	なし	なし	なし	なし	なし	0
					25	20	17.5	15	9	6	5										0.75	6M	なし	なし	なし	なし	なし	なし	なし	なし	なし	0
	ID	Age	性	ANCA陽性	BVAS 導入時	BVAS１M	BVAS2M	BVAS3M	BVAS6M	BVAS9M	BVAS12M	多発単神経炎	肺浸潤影	副鼻腔異常	心筋障害	糸球体腎炎	肺胞出血	紫斑、皮膚障害	免疫療法	気管支喘息		9M	なし	なし	なし	なし	なし	なし	なし	なし	なし	0
	211530	61	F									+	+	+	-	腎機能障害	-	+	+	+	564	12M	なし	なし	なし	なし	なし	なし	なし	なし	なし	0
				negative	末梢血好酸球数Dx.	１M	２M	3M	6M	9M	12M
					15695→128	36		38		14	31											176276	全身症状	皮膚	粘膜	耳鼻科	胸部	心血管	腹部	腎	神経
					ステロイド導入時	１M	２M	3M	6M	9M	12M											投与時	なし	なし	なし	なし	なし	なし	なし	なし	あり	9
					7.5	5	5	4	4	4	3										0.4	１M	なし	なし	なし	なし	なし	なし	なし	なし	あり	9
	ID	Age	性	ANCA陽性	BVAS Dx.	BVAS１M	BVAS2M	BVAS3M	BVAS6M	BVAS9M	BVAS12M	多発単神経炎	肺浸潤影	副鼻腔異常	心筋障害	糸球体腎炎	肺胞出血	紫斑、皮膚障害	免疫療法	気管支喘息		２M	なし	なし	なし	なし	なし	なし	なし	なし	あり	9
	207173	62	M									+	+	+	-	-	-	-	-	+		3M	なし	なし	なし	なし	なし	なし	なし	なし	なし	0
				P-ANCA23.1	末梢血好酸球数Dx.	１M	２M	3M	6M	9M	12M										未	6M	なし	なし	なし	なし	なし	なし	なし	なし	なし	0
					1510→411																	9M	なし	なし	なし	なし	なし	なし	なし	なし	なし	0
					ステロイド導入時	１M	２M	3M	6M	9M	12M											12M	なし	なし	なし	なし	なし	なし	なし	なし	なし	0
					30
	ID	Age	性	ANCA陽性	BVAS Dx.	BVAS１M	BVAS2M	BVAS3M	BVAS6M	BVAS9M	BVAS12M	多発単神経炎	肺浸潤影	副鼻腔異常	心筋障害	糸球体腎炎	肺胞出血	紫斑、皮膚障害	免疫療法	気管支喘息		207173	全身症状	皮膚	粘膜	耳鼻科	胸部	心血管	腹部	腎	神経
	168871	76	M									+	+	-	-	-	-	-	-	+		投与時	なし	なし	なし	なし	なし	なし	なし	なし	なし
				negative	末梢血好酸球数Dx.	１M	２M	3M	6M	9M	12M											１M
					不明																	２M
					ステロイド導入時	１M	２M	3M	6M	9M	12M											3M
																						6M
	ID	Age	性	ANCA陽性	BVAS 導入時	BVAS１M	BVAS2M	BVAS3M	BVAS6M	BVAS9M	BVAS12M	多発単神経炎	肺浸潤影	副鼻腔異常	心筋障害	糸球体腎炎	肺胞出血	紫斑、皮膚障害	免疫療法	気管支喘息		9M
	222741	82	F									+	+	-	-	-	-	-	+	+	942	12M
				negative	末梢血好酸球数Dx.	１M	２M	3M	6M	9M	12M
					20882→233	69	54	18	34		39											211530	全身症状	皮膚	粘膜	耳鼻科	胸部	心血管	腹部	腎	神経
					ステロイド導入時	１M	２M	3M	6M	9M	12M											投与時	筋肉痛	なし	なし	なし	浸潤影	なし	なし	なし	あり	14
					5	5	5	5	5	5	5										0	１M	なし	なし	なし	なし	浸潤影	なし	なし	なし	なし	4
											バースト改善											２M	なし	なし	なし	なし	なし	なし	なし	なし	なし	0
																						3M	なし	なし	なし	なし	なし	なし	なし	なし	なし	0
																						6M	なし	なし	なし	なし	なし	なし	なし	なし	なし	0
										好酸球数	ID	診断時	投与時	12週	24週	52週						9M	なし	なし	なし	なし	なし	なし	なし	なし	なし	0
											174766	4369	36	56	0	12						12M
											221004	41960	648	77	144	93
											176276	6673	18	30	35	67						168871	全身症状	皮膚	粘膜	耳鼻科	胸部	心血管	腹部	腎	神経
											211530	15695	128	38	14	31						投与時	なし	なし	なし	なし	なし	なし	なし	なし	なし
											222741	20882	233	54								１M
Table 1. Patient Characteristics of Diagnosis(N=5).										BVAS	174766	10	10	0	0	0						２M
											221004	0	0	0	0	0						3M
											176276	9	9	0	0	0						6M
Age			mean	60.4 (41-82)							211530	14	14	0	0	0						9M
ANCApositive			%	40							222741	0	0	0	0	0						12M
Eosinophil count			mean (/μL)	17915.8 (4369-41960)	17915.8
BVAS			mean	6.6 (0-14)	6.6				ステロイド減量率		174766		20	12.5	12	10	50					222741	全身症状	皮膚	粘膜	耳鼻科	胸部	心血管	腹部	腎	神経
Male/Female				1/4							221004		10	7	4	1	90					診断時	なし	なし	なし	なし	なし	なし	なし	なし	なし	0
asthma			%	80							176276		25	15	9	5	80					１M	なし	なし	なし	なし	なし	なし	なし	なし	なし	0
skin involvement			%	40							211530		7.5	4	4	3	60					２M	なし	なし	なし	なし	なし	なし	なし	なし	なし	0
pulmonary consolidation			%	100							222741		5	5	5	5	0					3M	なし	なし	なし	なし	なし	なし	なし	なし	なし	0
polyneuropathy			%	80						寛解	174766					100	100					6M	なし	なし	なし	なし	なし	なし	なし	なし	なし	0
sinus anomaly			%	40							221004											9M	なし	なし	なし	なし	なし	なし	なし	なし	なし	0
											176276											12M	なし	なし	なし	なし	なし	なし	なし	なし	なし	0
											211530
											222741
										CRP	174766
											221004
											176276
											211530
					Figure 1. Change of eosinophil parameter before and after mepolizumab						222741
													ID	Dx.	0W	12W	24W	52W
												Pt.1	174766	4369	36	56	1	12				Table 2.Changes in symptoms and lab databefore and after the introduction of Mepolizumab
														10	10	0	0.001	0
												Pt.2	221004	41960	648	77	144	93				Pt. No		Dx.EGPA	0M	3M	6M	12M
														0	0	0	0	0				1	corticosteroid	-	20	12.5	12	10
												Pt.3	176276	6673	18	30	35	67					Eosinophil	4369	36	56	0	12
														10	10	0	0	0					BVAS	10	10	0	0	0
												Pt.4	211530	15695	128	38	14	31				2	corticosteroid	-	10	7	4	1
														14	4	0	0	0					Eosinophil	41960	648	77	144	93
												Pt.5	222741	20882	233	18	34	39					BVAS	0	0	0	0	0
														0	0	0	0	0				3	corticosteroid	-	25	15	9	5
																							Eosinophil	6673	18	30	35	67
												Table 2.Changes in symptoms and lab databefore and after the introduction of Mepolizumab											BVAS	9	9	0	0	0
																						4	corticosteroid	-	7.5	4	4	3
												Pt. No		Dx.EGPA	0M	3M	6M	12M					Eosinophil	15695	128	38	14	31
												1	corticosteroid	-	20	12.5	12	10					BVAS	14	14	0	0	0
													BVAS	10	10	0	0	0				5	corticosteroid	-	5	5	5	5
												2	corticosteroid	-	10	7	4	1					Eosinophil	20882	233	18	34	39
													BVAS	0	0	0	0	0					BVAS	0	0	0	0	0
												3	corticosteroid	-	25	15	9	5
													BVAS	9	9	0	0	0
												4	corticosteroid	-	7.5	4	4	3
													BVAS	14	14	0	0	0
												5	corticosteroid	-	5	5	5	5
													BVAS	0	0	0	0	0
												5
